# Supplementary material for: Site-selective halogenation of mixed-valent vanadium oxide clusters
Source: Royal Society of Chemistry journal article supplement (doi:10.1039/d0dt01077d), 2020-01-01
Supplement: d0dt01077d1.pdf [file d0dt01077d1.pdf]

## **Site-Selective Halogenation of Mixed-valent Vanadium Oxide**

### **Clusters**

Michela L. Maiola,<sup>a</sup> Brittney E. Petel,<sup>a</sup> William W. Brennessel,<sup>a</sup> Ellen M. Matson\*<sup>a</sup>

<sup>a</sup>Department of Chemistry, University of Rochester, Rochester, New York 14627, United States

Corresponding author email: [matson@chem.rochester.edu](mailto:matson@chem.rochester.edu)

## Supporting Information Table of Contents:

|                                                                                                                                                                                                                                |    |
|--------------------------------------------------------------------------------------------------------------------------------------------------------------------------------------------------------------------------------|----|
| Procedure for NMR integration .....                                                                                                                                                                                            | S3 |
| <b>Figure S1.</b> $^1\text{H}$ NMR Spectrum of $\text{AlCl}_3$ with $[\text{V}_6\text{O}_7(\text{OC}_2\text{H}_5)_{12}]^n$ .....                                                                                               | S3 |
| <b>Figure S2.</b> $^1\text{H}$ NMR Spectrum of $\text{TMSCl}$ with <b>1-<math>\text{V}_6\text{O}_6\text{Cl}^{1-}</math></b> .....                                                                                              | S3 |
| <b>Figure S3.</b> $^1\text{H}$ NMR Spectrum of $\text{TiCl}_3(\text{thf})_3$ with <b>3-<math>\text{V}_6\text{O}_7^0</math></b> .....                                                                                           | S4 |
| <b>Figure S4.</b> $^1\text{H}$ NMR Spectrum of <b>1-<math>\text{V}_6\text{O}_6\text{Cl}^{1-}</math></b> and <b>4-<math>\text{V}_6\text{O}_6\text{Cl}^0</math></b> .....                                                        | S4 |
| <b>Table S1.</b> Crystallographic parameters of <b>4-<math>\text{V}_6\text{O}_6\text{Cl}^0</math></b> , <b>6-<math>\text{V}_6\text{O}_6\text{OTf}</math></b> , and <b>5-<math>\text{V}_6\text{O}_6\text{Cl}^+</math></b> ..... | S5 |
| <b>Figure S5.</b> $^1\text{H}$ NMR Spectrum of $\text{TiCl}_3(\text{thf})_3$ with $[\text{V}_6\text{O}_7(\text{OC}_2\text{H}_5)_{12}]^{2-}$ .....                                                                              | S6 |
| <b>Figure S6.</b> $^1\text{H}$ NMR Spectrum of $\text{TiCl}_3(\text{thf})_3$ with <b>3-<math>\text{V}_6\text{O}_7^0</math></b> .....                                                                                           | S6 |
| <b>Figure S7.</b> CV of $\text{TiCl}_3(\text{thf})_3$ .....                                                                                                                                                                    | S7 |
| <b>Figure S8.</b> $^1\text{H}$ NMR Spectrum of <b>4-<math>\text{V}_6\text{O}_6\text{Cl}^0</math></b> and <b>6-<math>\text{V}_6\text{O}_6\text{OTf}</math></b> .....                                                            | S7 |
| <b>Figure S9.</b> ESI-MS (-)ve of <b>6-<math>\text{V}_6\text{O}_6\text{OTf}</math></b> .....                                                                                                                                   | S8 |
| <b>Figure S10.</b> $^1\text{H}$ NMR Spectrum of <b>5-<math>\text{V}_6\text{O}_6\text{Cl}^+</math></b> .....                                                                                                                    | S8 |

**$^1\text{H}$  NMR yields:** Yields for  $4\text{-V}_6\text{O}_6\text{Cl}^0$  and for  $1\text{-V}_6\text{O}_6\text{Cl}^{1-}$  via the chlorination of  $[\text{V}_6\text{O}_7(\text{OC}_2\text{H}_5)_{12}]^{2-}$  with  $\text{TiCl}_3(\text{thf})_3$  were obtained by  $^1\text{H}$  NMR yields by integration against a known amount of internal standard, pyridine.

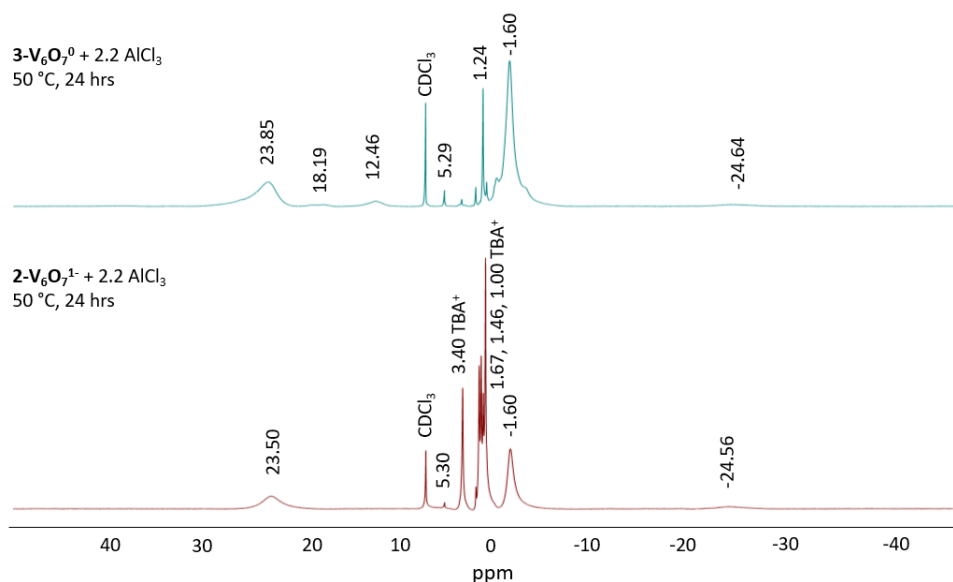

**Figure S1.**  $^1\text{H}$  NMR spectra of  $\text{AlCl}_3$  reactions with  $[\text{V}_6\text{O}_7(\text{OC}_2\text{H}_5)_{12}]^{1-}$  ( $2\text{-V}_6\text{O}_7^{1-}$ , bottom, red) and  $\text{V}_6\text{O}_7(\text{OC}_2\text{H}_5)_{12}$  ( $3\text{-V}_6\text{O}_7^0$ , top, blue) at  $50\text{ }^\circ\text{C}$  for 24 hours in  $\text{CDCl}_3$ . Resonances labeled as “TBA” correspond to the tetrabutylammonium counter ion of the starting material,  $2\text{-V}_6\text{O}_7^{1-}$ .

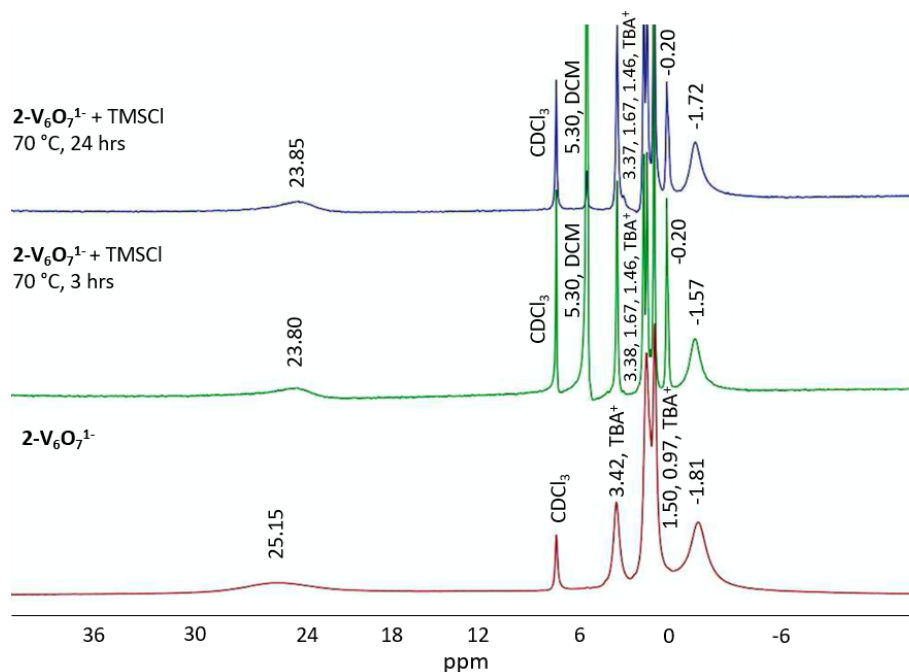

**Figure S2.**  $^1\text{H}$  NMR spectra of  $[\text{V}_6\text{O}_7(\text{OC}_2\text{H}_5)_{12}]^{1-}$  ( $2\text{-V}_6\text{O}_7^{1-}$ , bottom, red) and  $\text{TMSCl}$  reactions with  $[\text{V}_6\text{O}_7(\text{OC}_2\text{H}_5)_{12}]^{1-}$  ( $2\text{-V}_6\text{O}_7^{1-}$ ) at  $70\text{ }^\circ\text{C}$  for 3 hours (middle, green) and at  $70\text{ }^\circ\text{C}$  for 24 hours (top, blue) in  $\text{CDCl}_3$ . Resonances labeled as “TBA” correspond to the tetrabutylammonium counter ion of the starting material,  $2\text{-V}_6\text{O}_7^{1-}$ . Resonances labeled as DCM correspond to dichloromethane.

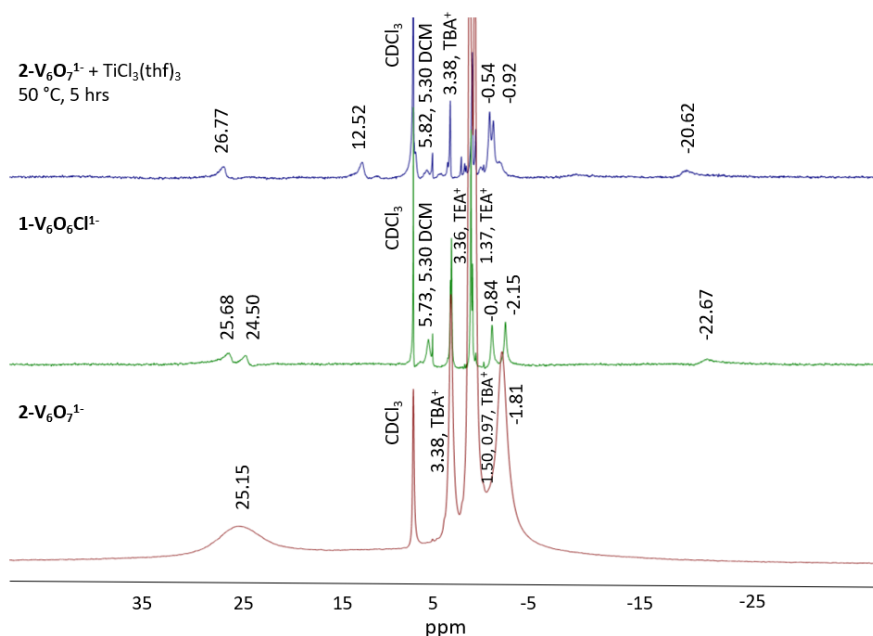

**Figure S3.**  $^1\text{H}$  NMR spectra of  $[\text{V}_6\text{O}_7(\text{OC}_2\text{H}_5)_{12}]^{1-}$  (**2-V<sub>6</sub>O<sub>7</sub><sup>1-</sup>**, bottom, red),  $[\text{V}_6\text{O}_6\text{Cl}(\text{OC}_2\text{H}_5)_{12}]^{1-}$  (**1-V<sub>6</sub>O<sub>6</sub>Cl<sup>1-</sup>**, middle, green), and the reaction of  $\text{TiCl}_3(\text{thf})_3$  with **2-V<sub>6</sub>O<sub>7</sub><sup>1-</sup>** at 50 °C for 5 hours in  $\text{CDCl}_3$ . Resonances labeled as “TBA” correspond to the tetrabutylammonium counter ion of the starting material, **2-V<sub>6</sub>O<sub>7</sub><sup>1-</sup>**, while signals labeled as “TEA” correspond to the tetraethylammonium cation of the independently synthesized sample of **1-V<sub>6</sub>O<sub>6</sub>Cl<sup>1-</sup>**. Resonances labeled as DCM correspond to dichloromethane.

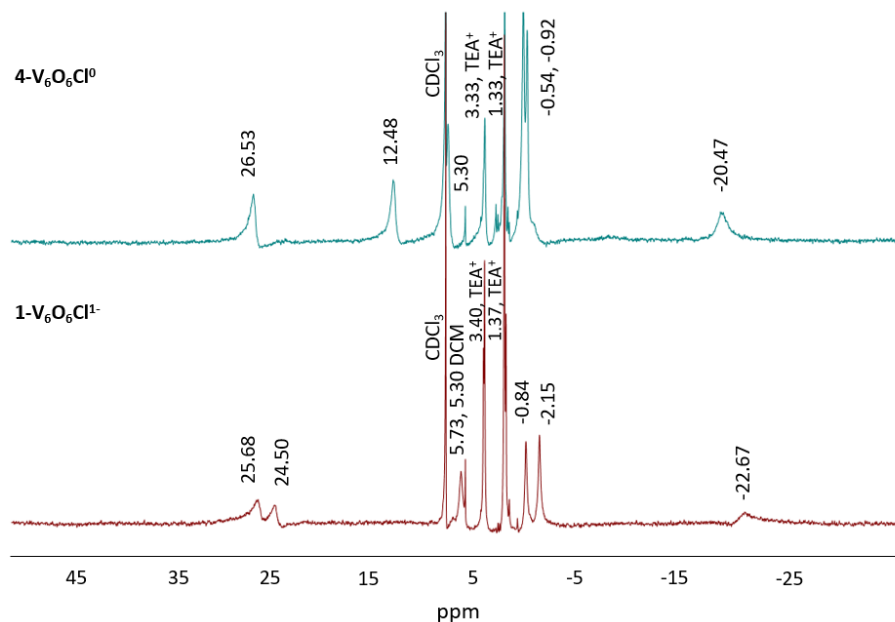

**Figure S4.**  $^1\text{H}$  NMR spectra of  $[\text{V}_6\text{O}_6\text{Cl}(\text{OC}_2\text{H}_5)_{12}]^{1-}$  (**1-V<sub>6</sub>O<sub>6</sub>Cl<sup>1-</sup>**, bottom, red) and  $[\text{V}_6\text{O}_6\text{Cl}(\text{OC}_2\text{H}_5)_{12}]^0$  (**4-V<sub>6</sub>O<sub>6</sub>Cl<sup>0</sup>**, top, blue) in  $\text{CDCl}_3$ . Resonances labeled as “TBA” correspond to the tetrabutylammonium counter ion of the starting material, **2-V<sub>6</sub>O<sub>7</sub><sup>1-</sup>**, while signals labeled as “TEA” correspond to the tetraethylammonium cation of the independently synthesized sample of **1-V<sub>6</sub>O<sub>6</sub>Cl<sup>1-</sup>**. Resonances labeled as DCM correspond to dichloromethane.

**Table S1.** Crystallographic Parameters of **4-V<sub>6</sub>O<sub>6</sub>Cl<sup>0</sup>**, **6-V<sub>6</sub>O<sub>6</sub>OTf**, and **5-V<sub>6</sub>O<sub>6</sub>Cl<sup>+</sup>**.

|                                   |                                                                                                   |                                                                                                                |                                                                                                                |
|-----------------------------------|---------------------------------------------------------------------------------------------------|----------------------------------------------------------------------------------------------------------------|----------------------------------------------------------------------------------------------------------------|
| Molecule                          | 4-V <sub>6</sub> O <sub>6</sub> Cl <sup>0</sup>                                                   | 6-V <sub>6</sub> O <sub>6</sub> OTf                                                                            | 5-V <sub>6</sub> O <sub>6</sub> Cl <sup>+</sup>                                                                |
| Empirical formula                 | C <sub>24</sub> H <sub>60</sub> ClO <sub>18</sub> V <sub>6</sub>                                  | C <sub>25</sub> H <sub>60</sub> F <sub>3</sub> O <sub>21</sub> SV <sub>6</sub>                                 | C <sub>28</sub> H <sub>70</sub> Cl <sub>6</sub> O <sub>26</sub> V <sub>6</sub> W <sub>3</sub>                  |
| Formula weight                    | 977.82                                                                                            | 1091.43                                                                                                        | 1892.73                                                                                                        |
| CCDC                              | 1990064                                                                                           | 1990063                                                                                                        | 1990062                                                                                                        |
| Temperature                       | 223.00(10) K                                                                                      | 100.00(10) K                                                                                                   | 100.00(10) K                                                                                                   |
| Wavelength                        | 1.54184 Å                                                                                         | 1.54184 Å                                                                                                      | 1.54184 Å                                                                                                      |
| Crystal system                    | Monoclinic                                                                                        | Triclinic                                                                                                      | Triclinic                                                                                                      |
| Space group                       | I2/m                                                                                              | P-1                                                                                                            | P-1                                                                                                            |
| Unit cell dimensions              | a = 10.7617(7) Å<br>b = 17.7653(9) Å<br>c = 10.9667(7) Å<br>α = 90°<br>β = 107.866(7)°<br>γ = 90° | a = 10.7375(2) Å<br>b = 11.6187(3) Å<br>c = 19.2768(4) Å<br>α = 83.447(2)°<br>β = 77.638(2)°<br>γ = 64.530(2)° | a = 10.7819(4) Å<br>b = 15.5823(4) Å<br>c = 16.9994(5) Å<br>α = 81.532(2)°<br>β = 87.046(3)°<br>γ = 83.092(3)° |
| Volume                            | 1995.5(2) Å <sup>3</sup>                                                                          | 2120.16(9) Å <sup>3</sup>                                                                                      | 2802.71(15) Å <sup>3</sup>                                                                                     |
| Z                                 | 2                                                                                                 | 2                                                                                                              | 2                                                                                                              |
| Reflections collected             | 2173                                                                                              | 35608                                                                                                          | 48081                                                                                                          |
| Independent reflections           | 2173                                                                                              | 8882 [R(int) = 0.0763]                                                                                         | 11712 [R(int) = 0.1213]                                                                                        |
| Goodness-of-fit on F <sup>2</sup> | 1.040                                                                                             | 1.044                                                                                                          | 1.082                                                                                                          |
| Final R indices [I > 2σ(I)]       | R1 = 0.0712, wR2 = 0.2043                                                                         | R1 = 0.0732, wR2 = 0.2077                                                                                      | R1 = 0.1002, wR2 = 0.2861                                                                                      |

**Comments on Disorder in Complex 5-V<sub>6</sub>O<sub>6</sub>Cl<sup>+</sup>.** Three ethoxy ligands of the vanadium cluster are modeled as disordered over two positions each: O10-C7-C8, 0.51(3):0.49(3), O14-C15-C16, 0.60(3):0.40(3), O17-C21-C22, 0.52(3):0.48(3). A major portion of the tungsten cluster was modeled as disordered over two positions (0.740(1):0.260(1)). An additional methyl group of an ethoxy ligand on this cluster was also modeled as disordered over two positions 0.77(6):0.23(6).

For each disordered moiety, analogous bond lengths and angles between the two defined positions were restrained to be similar. Anisotropic displacement parameters for proximal atoms were constrained to be equivalent and/or restrained to be similar.

The larger-than-expected residual peaks and holes in the difference Fourier map that appear near the heavy tungsten atoms may be related to absorption correction errors. A face-indexing absorption correction of the tiny nearly-cubic crystal reduced the absolute value of the residuals very slightly over spherical and empirical absorption corrections. The crystal was cracked, however, with a 85:15 component mass ratio. No non-merohedral twin modeling was successful, likely since the reflections of the two components could not be resolved well. To date no better crystals have been found for analysis.

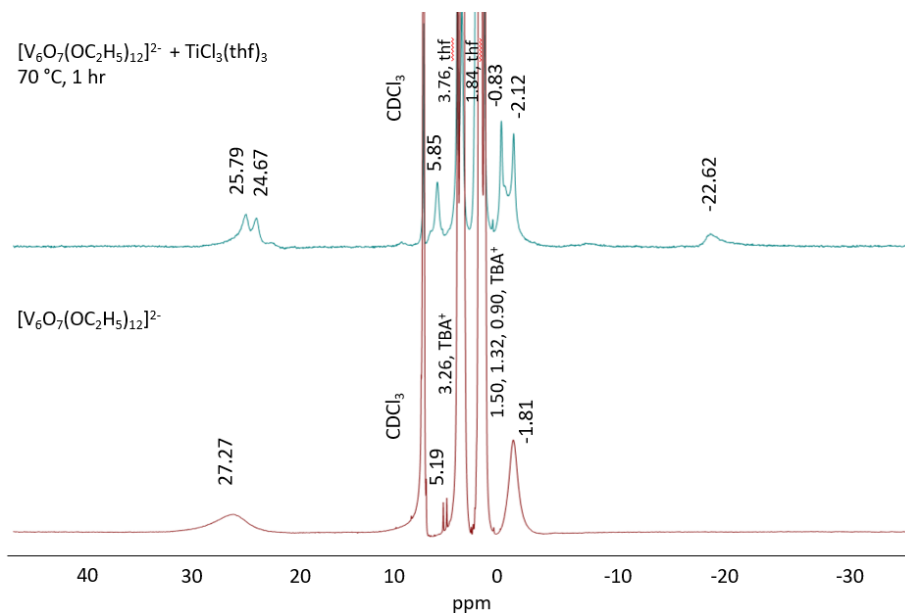

**Figure S5.**  $^1\text{H}$  NMR spectra of  $[\text{V}_6\text{O}_7(\text{OC}_2\text{H}_5)_{12}]^{2-}$  (bottom, red) and the reaction of  $\text{TiCl}_3(\text{thf})_3$  with  $[\text{V}_6\text{O}_7(\text{OC}_2\text{H}_5)_{12}]^{2-}$  (top, blue) at  $70^\circ\text{C}$  for 1 hour in  $\text{CDCl}_3$ . Resonances labeled as “TBA” correspond to the tetrabutylammonium counter ion of the starting material,  $2\text{-V}_6\text{O}_7^{1-}$ . Signals labeled as “thf” correspond to tetrahydrofuran.

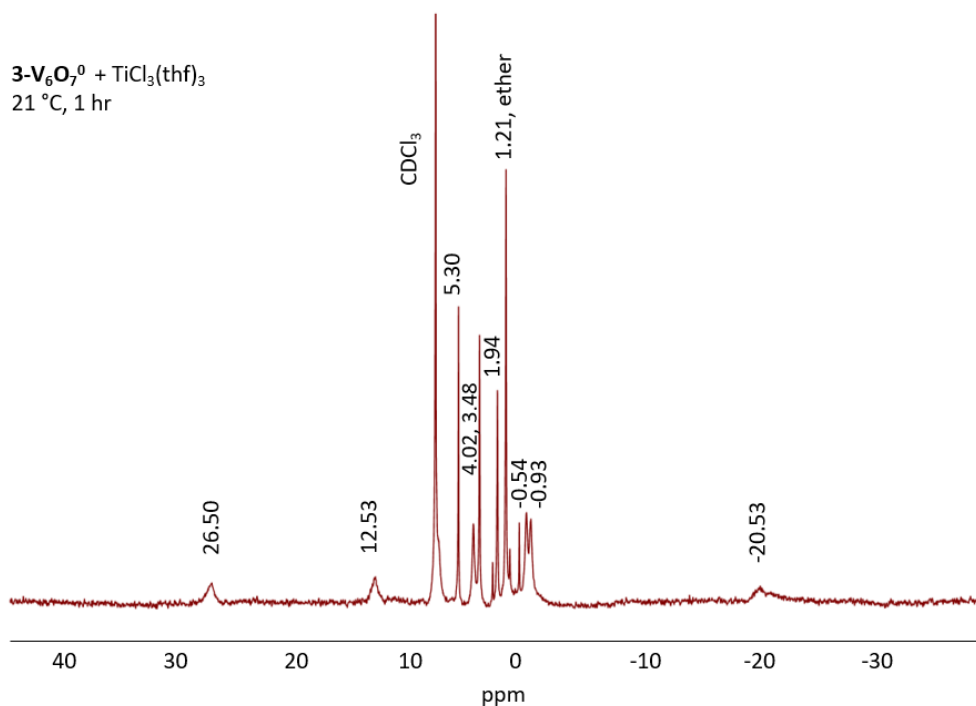

**Figure S6.**  $^1\text{H}$  NMR spectra of the reaction of  $\text{TiCl}_3(\text{thf})_3$  with  $\text{V}_6\text{O}_7(\text{OC}_2\text{H}_5)_{12}$  ( $3\text{-V}_6\text{O}_7^0$ ) at  $21^\circ\text{C}$  for 1 hour in  $\text{CDCl}_3$ . Diamagnetic region has been labeled indicating organic solvent impurities (e.g. diethyl ether, dichloromethane).

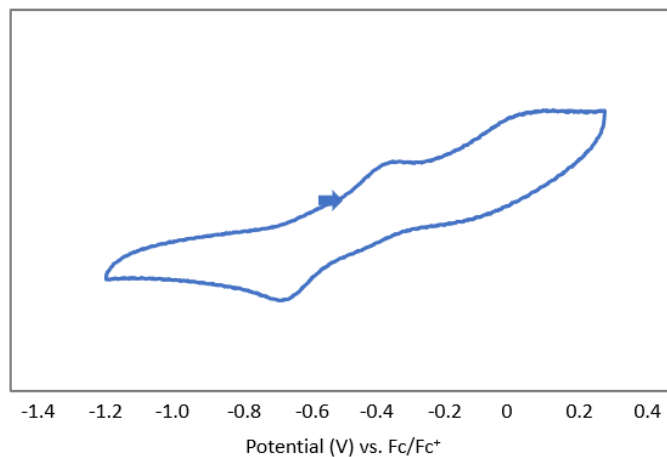

**Figure S7.** Cyclic voltammogram of  $\text{TiCl}_3(\text{thf})_3$  collected in dichloromethane with 0.1 M  $[\text{nBu}_4\text{N}][\text{PF}_6]$  as the supporting electrolyte.

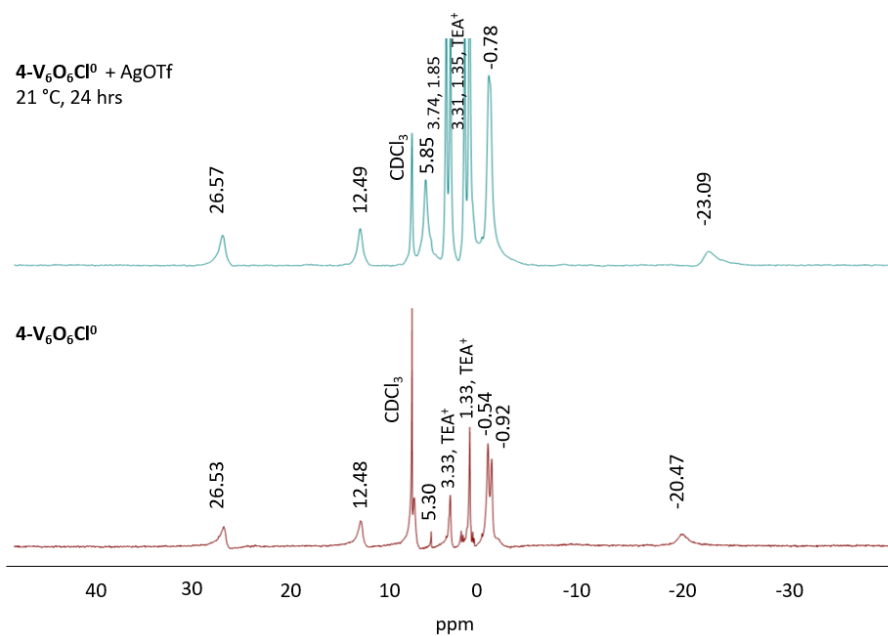

**Figure S8.**  $^1\text{H}$  NMR spectra of  $\text{V}_6\text{O}_6\text{Cl}(\text{OC}_2\text{H}_5)_{12}$  ( $4\text{-V}_6\text{O}_6\text{Cl}^0$ , bottom, red) and the reaction of  $\text{AgOTf}$  with  $4\text{-V}_6\text{O}_6\text{Cl}^0$  (top, blue) at 21 °C for 24 hours in  $\text{CDCl}_3$ . Resonances labeled as “TEA” correspond to residual tetraethylammonium salts from independent synthesis.

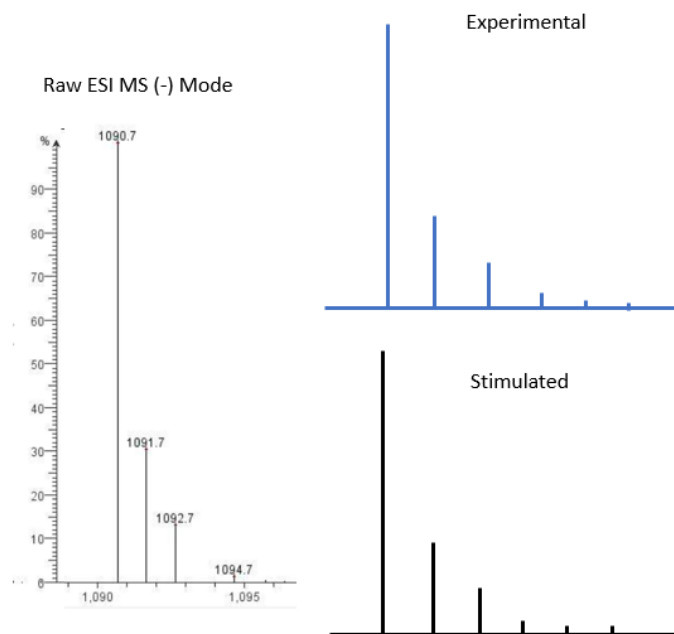

**Figure S9.** ESI-MS (-)ve of **6-V<sub>6</sub>O<sub>6</sub>OTf** ( $m/z = 1091$  amu;  $[V_6O_6(OC_2H_5)_{12}]OTf$ ).

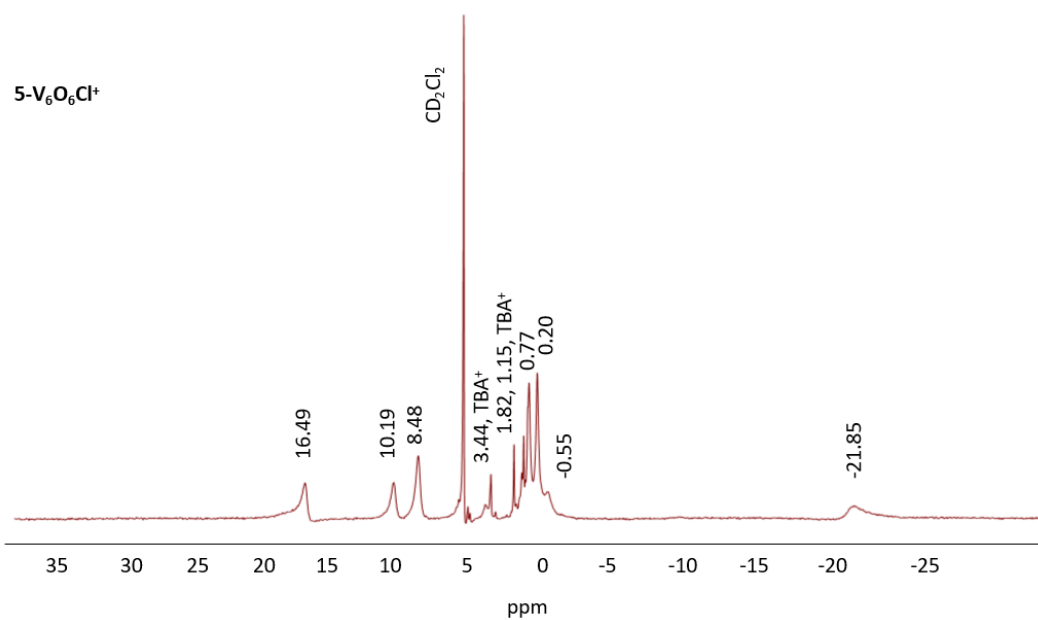

**Figure S10.**  $^1H$  NMR spectra of  $[V_6O_6Cl(OC_2H_5)_{12}]^{1+}$  (**5-V<sub>6</sub>O<sub>6</sub>Cl<sup>+</sup>**) in  $CD_2Cl_2$  synthesized by the reaction of  $WCl_6$  with  $V_6O_7(OC_2H_5)_{12}$  (**3-V<sub>6</sub>O<sub>7</sub><sup>0</sup>**). Resonances labeled as “TBA” correspond to the tetrabutylammonium counter ion of the starting material, **2-V<sub>6</sub>O<sub>7</sub><sup>1-</sup>**.
